# Supplementary material for: Eu(iii) emission band changes caused by peripheral C–H/O hydrogen bonding
Source: Royal Society of Chemistry journal article supplement (doi:10.1039/c2dt30538k), 2012-01-01
Supplement: c2dt30538k.pdf [file c2dt30538k.pdf]

## Supporting Information

### **Eu(III) Emission Band Changes Caused by Peripheral C-H/O Hydrogen Bonding**

Yusuke Kuramochi<sup>\*,[a, c]</sup>, Tetsuya Nakagawa<sup>[a, d]</sup>, Toshiaki Yokoo<sup>[b]</sup>, Junpei Yuasa<sup>[a]</sup>,

Tsuyoshi Kawai<sup>[a]</sup> and Yasuchika Hasegawa<sup>\*,[a, e]</sup>

*[a] Graduate School of Materials Science, Nara Institute of Science and Technology*

*[b] Science & Technology Research Centre, Mitsubishi Chemical Corporation*

*[c] Current address: Graduate School of Science, Kitasato University*

*[d] Current address: OPERA, Kyushu University*

*[e] Current address: Graduate School of Engineering, Hokkaido University*

*E-mail: [kuramo@kitasato-u.ac.jp](mailto:kuramo@kitasato-u.ac.jp), [hasegaway@eng.hokudai.ac.jp](mailto:hasegaway@eng.hokudai.ac.jp)*

**General Methods.** Acetone- $d_6$  (D, 99.9%) and  $CDCl_3$  (D, 99.8%) were obtained from Cambridge Isotope laboratories, Inc. All chemicals and solvents were of commercial reagent quality and were used without further purification.  $^1H$  (500 MHz),  $^{19}F$  (470 MHz) and  $^{31}P$  NMR (200 MHz) spectra were recorded on JEOL ECP-500. Chemical shifts were reported in  $\delta$  ppm, referenced to internal tetramethylsilane standard for  $^1H$  NMR, external hexafluorobenzene standard for  $^{19}F$  NMR and external 85%  $H_3PO_4$  standard for  $^{31}P$  NMR. ESI-mass spectra were measured on JEOL JMS-700MStation. The observed and calculated values refer to the most abundant peak. IR spectra were recorded on JASCO FT/IR-420 spectrometer. Elemental analyses were performed by Perkin Elmer 2400II.

**Preparation of [tris(diphenylphosphinyl)methane]tris(hexafluoroacetylacetonato)-europium(III): Eu(hfa) $_3$ (TPPM).** TPPM (302 mg,  $4.9 \times 10^{-4}$  mol) and  $EuCl_3 \cdot 6H_2O$  (577 mg,  $1.6 \times 10^{-3}$  mol) were placed in a 20 mL flask, and the flask was purged with Ar gas. Acetonitrile (15 mL) was added and the solution was stirred for 5 h at room temperature. The resulting white suspension was added by hexafluoroacetylacetonone (hfa- $H_2$ ; 0.67 mL,  $4.7 \times 10^{-3}$  mol) and ethanol (3 mL). The reaction mixture became a clear solution and was then stirred for 16 h at room temperature. The reaction mixture was evaporated to dryness, and the residue was extracted with toluene (20 mL). After the suspension was stirred for 1 h, the insoluble material was removed by filtration and the filtrate was evaporated to dryness. A pale yellow solid was recrystallized from chloroform/hexane to attain colorless crystals (260 mg, 38% based on TPPM): IR (ATR)  $\nu_{max}$  / $cm^{-1}$  1649, 1556, 1531, 1483, 1442, 1252, 1200, 1137, 1097, 798, 768, 733, 692, 685, 660;  $^{19}F$  NMR (470 MHz,  $CDCl_3$ ,  $C_6F_6$ )  $\delta$  -79.4, -80.0;  $^{31}P$  NMR (200 MHz,  $CDCl_3$ ,  $H_3PO_4$ )  $\delta$  9.17; ESI-Mass ( $m/z$ ) calcd for  $C_{47}H_{33}EuF_{12}O_7P_3$  ( $Eu(hfa)_2(TPPM)^+$ ) 1183.046 ( $^{153}Eu$ ), found 1183.043 ( $^{153}Eu$ ); elemental analysis calcd for  $C_{52}H_{34}EuF_{18}O_9P_3 \cdot 5CHCl_3$ : C, 34.46; H, 1.98%; found: C, 34.46; H, 1.62%.

**Preparation of [tris(diphenylphosphinyl)methane]tris(hexafluoroacetylacetonato)-samarium(III): Sm(hfa) $_3$ (TPPM).** The Sm(III) complex was synthesized by the same procedure as that used for  $Eu(hfa)_3(TPPM)$ , except for the use of  $SmCl_3 \cdot 6H_2O$  instead of  $EuCl_3 \cdot 6H_2O$ . Colorless crystals were isolated (193 mg, 43% based on TPPM). IR (ATR)  $\nu_{max}$  / $cm^{-1}$  1649, 1558, 1523, 1506,

1473, 1441, 1253, 1198, 1138, 1112, 1093, 799, 791, 769, 732, 697, 686, 660;  $^{19}\text{F}$  NMR (470 MHz,  $\text{CDCl}_3$ ,  $\text{C}_6\text{F}_6$ )  $\delta$  -76.0, -76.1;  $^{31}\text{P}$  NMR (200 MHz,  $\text{CDCl}_3$ ,  $\text{H}_3\text{PO}_4$ )  $\delta$  40.78; ESI-Mass ( $m/z$ ) calcd for  $\text{C}_{47}\text{H}_{33}\text{F}_{12}\text{O}_7\text{P}_3\text{Sm}(\text{Sm}(\text{hfa})_2(\text{TPPM})^+)$  1182.0 ( $^{152}\text{Sm}$ ), found 1182.0 ( $^{152}\text{Sm}$ ); elemental analysis calcd for  $\text{C}_{52}\text{H}_{34}\text{F}_{18}\text{O}_9\text{P}_3\text{Sm}\cdot 2\text{CHCl}_3$ : C, 39.87; H, 2.23%; found: C, 39.74; H, 2.05%.

**Crystallography.** Colorless single crystals of  $\text{Eu}(\text{hfa})_3(\text{TPPM})$  obtained from chloroform/hexane and acetone/water solutions were mounted on a glass fiber using epoxy resin glue. All measurements were made with a graphite monochromated Mo-K $\alpha$  radiation on a Rigaku RAXIS RAPID utilizing its imaging plate as the area detector. The data were collected at a temperature of  $-80 \pm 1$  °C to a maximum  $2\theta$  value of  $54.9^\circ$ . Corrections for decay and Lorentz-polarization effects were made with empirical absorption correction solved by direct methods and expanded using Fourier techniques. The non-hydrogen atoms were refined anisotropically. Hydrogen atoms were refined using the riding model. The final cycle of full-matrix least-squares refinement was based on observed reflections and variable parameters. All calculations were performed using the crystal structure crystallographic software package. We confirmed the CIF data by using the checkCIF/PLATON service. The supplementary crystallographic data for this paper are contained in CCDC-852900 (crystal 1) and 852901 (crystal 2). Their data can be obtained free of charge from The Cambridge Crystallographic Data Centre via [www.ccdc.cam.ac.uk/data\\_request/cif](http://www.ccdc.cam.ac.uk/data_request/cif).

**Optical Measurements.** Emission spectra of Eu(III) complexes were measured with a Hitachi F-4500 spectrometer. Emission spectra at various temperatures were measured using a nitrogen cryostat (Oxford Instruments, Optistat DN). Emission quantum yields of Eu(III) complexes were obtained and compared with emission signal integration (570–640 nm) of  $\text{Eu}(\text{hfa})_3(\text{TPPO})_2$  as a reference ( $\Phi = 0.65$  in acetone- $d_6$ ) using an excitation wavelength of 465 nm.<sup>1,2</sup> Emission quantum yield of Sm(III) complex was obtained and compared with emission signal integration (530–680 nm) of  $\text{Sm}(\text{hfa})_3(\text{phen})_2$  as a reference ( $\Phi = 0.014$  in acetone) using an excitation wavelength of 360 nm.<sup>2,3</sup> Emission lifetimes were measured with the third harmonic (355 nm) of a Q-switched Nd:YAG laser (Spectra Physics, INDI-50, fwhm = 5 ns,  $\lambda = 1064$  nm) and a photomultiplier (Hamamatsu Photonics, R5108, response time  $\leq 1.1$  ns). The Nd:YAG laser response was monitored with a

digital oscilloscope (Sony Tektronix, TDS3052, 500 MHz) synchronized to the single-pulse excitation. High-resolution emission spectra were obtained with SPEX FluoroLog-3.

## References

- 1 K. Nakamura, Y. Hasegawa, H. Kawai, N. Yasuda, Y. Tsukahara and Y. Wada, *Thin Solid Films*, **2008**, *516*, 2376-2381.
- 2 J. N. Demas and G. A. Crosby, *J. Phys. Chem.* **1971**, *75*, 991-1024.
- 3 Y. Hasegawa, S. Tsuruoka, T. Yoshida, H. Kawai and T. Kawai, *J. Phys. Chem. A* **2008**, *112*, 803-807.

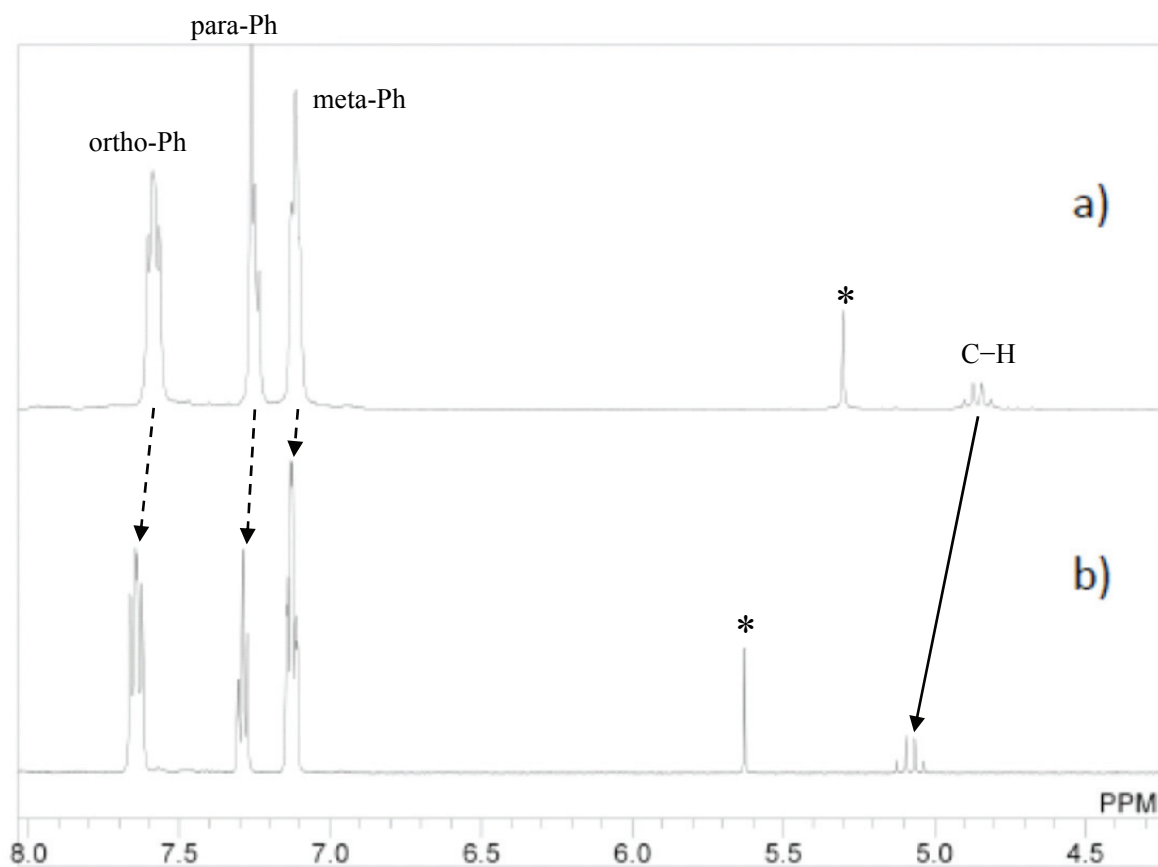

**Figure S1.** <sup>1</sup>H NMR spectra of TPPM in a) CDCl<sub>3</sub> and b) [D<sub>6</sub>]acetone. The asterisks (\*) correspond to dichloromethane: H. E. Gottlieb, V. Kotlyar, A. Nudelman, *J. Org. Chem.* **1997**, *62*, 7512.

a) Crystal 1

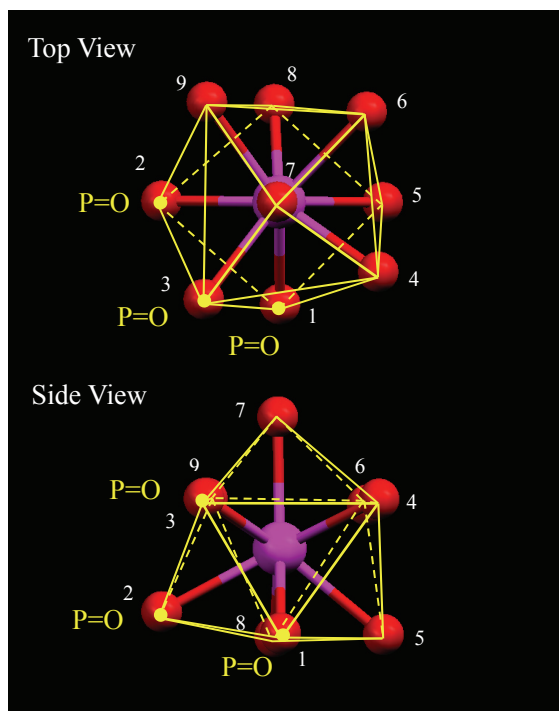

b) Crystal 2

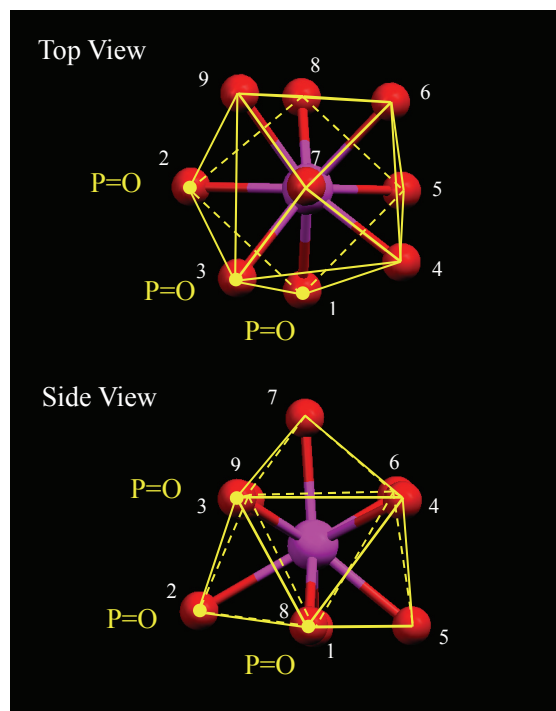

c)

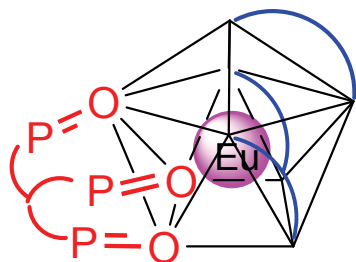

d)

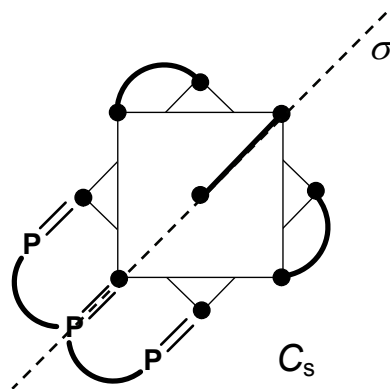

**Figure S2.** Coordination polyhedrons of a) **crystal 1** and b) **crystal 2**. c) Simplified diagram of the coordination structure of **crystal 1** and **crystal 2**. d) Geometrical image of  $\text{Eu}(\text{hfa})_3(\text{TPPM})$  as viewed from above. Coordinated oxygen atoms are shown as dots in the images and the curved lines between oxygen atoms represent the hfa linkages.

**Table S1.** Observed Dihedral Angles ( $\delta_i$ ), Dihedral Angles of Ideal Monocapped Square Antiprism ( $\theta_i$ ) and Measure Shape Criterion,  $S(C_{4v})$  for Crystal 1

| Edge  | $\delta_i$ | $\theta_i$ | $\delta_i - \theta_i$ |
|-------|------------|------------|-----------------------|
| O2–O5 | 12.95      | 0.0        | 13.0                  |
| O1–O5 | 78.72      | 69.1       | 9.6                   |
| O5–O8 | 76.07      | 69.1       | 7.0                   |
| O8–O2 | 72.88      | 69.1       | 3.8                   |
| O2–O1 | 70.00      | 69.1       | 0.9                   |
| O4–O5 | 53.91      | 53.0       | 0.9                   |
| O5–O6 | 50.26      | 53.0       | -2.7                  |
| O6–O8 | 45.00      | 53.0       | -8.0                  |
| O8–O9 | 50.48      | 53.0       | -2.5                  |
| O9–O2 | 59.75      | 53.0       | 6.8                   |
| O2–O3 | 61.75      | 53.0       | 8.8                   |
| O3–O1 | 58.66      | 53.0       | 5.7                   |
| O1–O4 | 43.93      | 53.0       | -9.1                  |
| O4–O6 | 44.51      | 37.6       | 6.9                   |
| O6–O9 | 47.66      | 37.6       | 10.1                  |
| O9–O3 | 19.91      | 37.6       | -17.7                 |
| O3–O4 | 38.80      | 37.6       | 1.2                   |
| O7–O4 | 56.12      | 59.0       | -2.9                  |
| O7–O6 | 48.99      | 59.0       | -10.0                 |
| O7–O9 | 63.49      | 59.0       | 4.5                   |
| O7–O3 | 67.53      | 59.0       | 8.5                   |

$S(C_{4v}) = 7.88$

**Table S2.** Observed Dihedral Angles ( $\delta_i$ ), Dihedral Angles of Ideal Monocapped Square Antiprism ( $\theta_i$ ) and Measure Shape Criterion,  $S(C_{4v})$  for Crystal 2

| Edge  | $\delta_i$ | $\theta_i$ | $\delta_i - \theta_i$ |
|-------|------------|------------|-----------------------|
| O2–O5 | 9.57       | 0.0        | 9.6                   |
| O1–O5 | 74.65      | 69.1       | 5.6                   |
| O5–O8 | 75.90      | 69.1       | 6.8                   |
| O8–O2 | 71.75      | 69.1       | 2.7                   |
| O2–O1 | 71.13      | 69.1       | 2.0                   |
| O4–O5 | 54.82      | 53.0       | 1.8                   |
| O5–O6 | 49.80      | 53.0       | -3.2                  |
| O6–O8 | 45.01      | 53.0       | -8.0                  |
| O8–O9 | 48.48      | 53.0       | -4.5                  |
| O9–O2 | 61.93      | 53.0       | 8.9                   |
| O2–O3 | 60.54      | 53.0       | 7.5                   |
| O3–O1 | 55.74      | 53.0       | 2.7                   |
| O1–O4 | 47.52      | 53.0       | -5.5                  |
| O4–O6 | 44.36      | 37.6       | 6.8                   |
| O6–O9 | 47.28      | 37.6       | 9.7                   |
| O9–O3 | 17.47      | 37.6       | -20.1                 |
| O3–O4 | 38.65      | 37.6       | 1.1                   |
| O7–O4 | 54.25      | 59.0       | -4.8                  |
| O7–O6 | 53.61      | 59.0       | -5.4                  |
| O7–O9 | 62.36      | 59.0       | 3.4                   |
| O7–O3 | 68.38      | 59.0       | 9.4                   |

$S(C_{4v}) = 7.39$



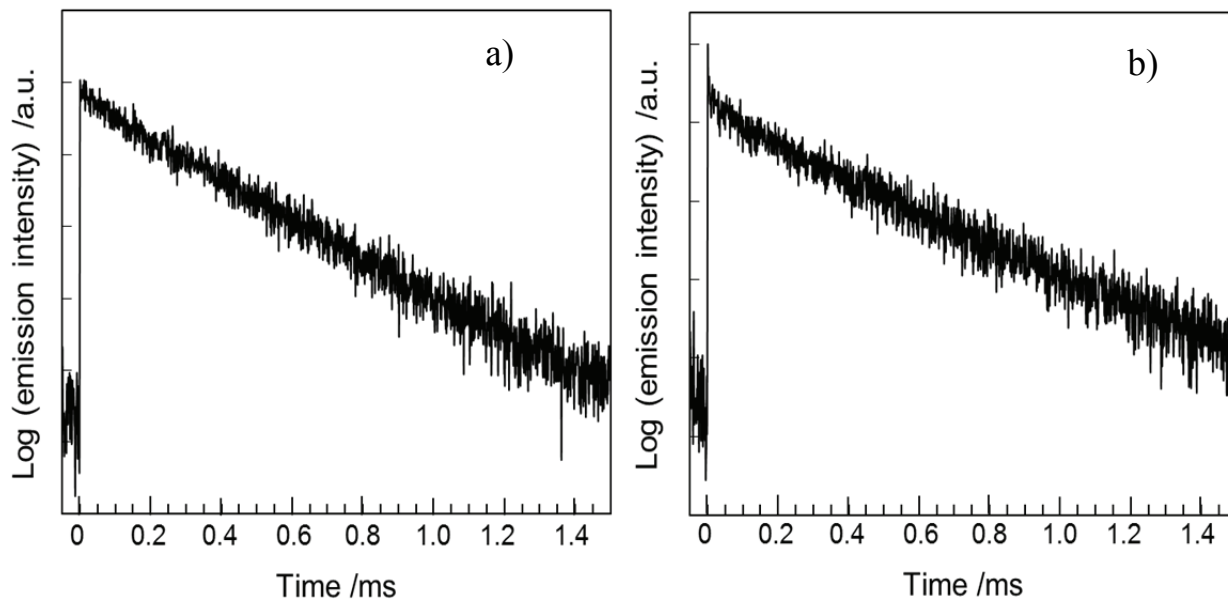

**Figure S3.** Decay profiles of  $\text{Eu}(\text{hfa})_3(\text{TPPM})$  in a)  $\text{CDCl}_3$  and b)  $[\text{D}_6]\text{acetone}$ .

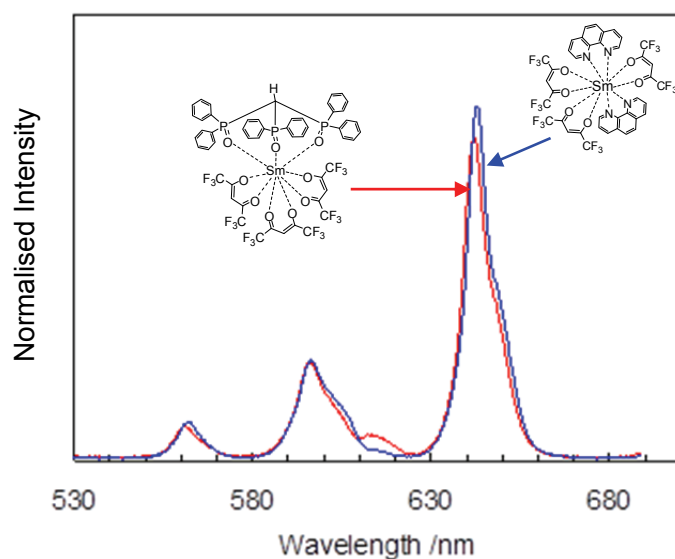

**Figure S4.** Emission spectra of  $\text{Sm}(\text{hfa})_3(\text{TPPM})$  and  $\text{Sm}(\text{hfa})_3(\text{phen})_2$  in acetone at room temperature. The spectral intensity is normalised to the magnetic dipole transition ( ${}^4\text{G}_{5/2}-{}^6\text{H}_{7/2}$ ).  
 $\text{Sm}(\text{hfa})_3(\text{phen})_2$ : Y. Hasegawa, S. Tsuruoka, T. Yoshida, H. Kawai, T. Kawai, *J. Phys. Chem. A* **2008**, *112*, 803.

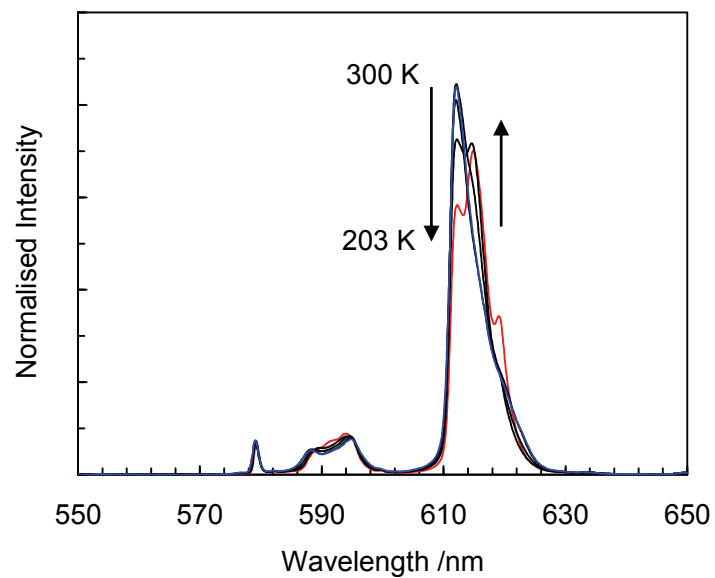

**Figure S5.** Emission spectra of Eu(hfa)<sub>3</sub>(TPPM) at 300, 273, 253, 223, 203 K (1.36 M acetone /dichloromethane,  $\lambda_{\text{ex}} = 350$  nm). The spectral intensity is normalised to the  $^5\text{D}_0 \rightarrow ^7\text{F}_1$  (magnetic-dipole) transition.
